# Supplementary material
Source: PubMed Central journal article supplement (PMC3135268)
Supplement: Supp_Data.pdf [file Supp_Data.pdf]

## Supplementary Data

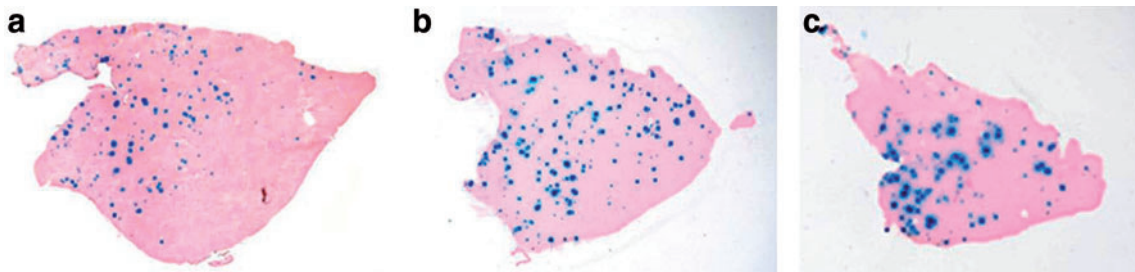

**SUPPLEMENTARY FIG. 1.**  $\beta$ -Galactosidase expression in rat liver after transient Kupffer cell removal and intrabiliary infusion of plasmid DNA (a), PEI-DNA nanoparticles (N/P = 10) (b), or chitosan-DNA nanoparticles (N/P = 3) (c). One day after bile duct infusion, rat livers were harvested and frozen using liquid nitrogen. Cryostat sections of 5–8  $\mu$ m were cut from different lobes of the liver. The sections were then fixed in PBS containing 0.5% glutaraldehyde at 4°C for 15 min and washed twice with PBS. The sections were stained with a LacZ reporter assay kit (tissue staining) (InvivoGen, San Diego, CA) at 37°C for 3 hr. The stained sections were washed twice with PBS, counterstained with 0.1% (w/v) Nuclear Fast Red for 3 min, then dehydrated and mounted. Naked DNA mediated a significant level of gene expression. Nevertheless, transgene expression was much higher and more widely distributed throughout the liver in PEI-DNA and chitosan-DNA nanoparticle-transfected groups.
